# Supplementary material for: High performance planar p-i-n perovskite solar cells based on a thin Alq3 cathode buffer layer
Source: Royal Society of Chemistry journal article supplement (doi:10.1039/c8ra01633j), 2018-01-01
Supplement: c8ra01633j1.pdf [file c8ra01633j1.pdf]

Electronic Supplementary Information

**High performance planar *p-i-n* perovskite solar cells based on thin  
Alq<sub>3</sub> cathode buffer layer**

Lijia Chen<sup>1#</sup>, Gang Wang<sup>2,3#</sup>, Lianbin Niu<sup>1</sup>, Yanqing Yao<sup>2,3</sup>, Yunxia Guan<sup>1</sup>, Yuting Cui<sup>1</sup>, Qunliang Song<sup>2,3\*</sup>

1 College of Physics and Electronics Engineering, Chongqing Normal University, Chongqing 401331, P. R. China

2 Institute for Clean Energy and Advanced Materials, Faculty of Materials and Energy, Southwest University, Chongqing 400715, P. R. China.

3 Chongqing Key Laboratory for Advanced Materials and Technologies of Clean Energy, Chongqing 400715, P. R. China

# L. Chen and G. Wang contributed equally to this work

\* E-mail: [qlsong@swu.edu.cn](mailto:qlsong@swu.edu.cn)

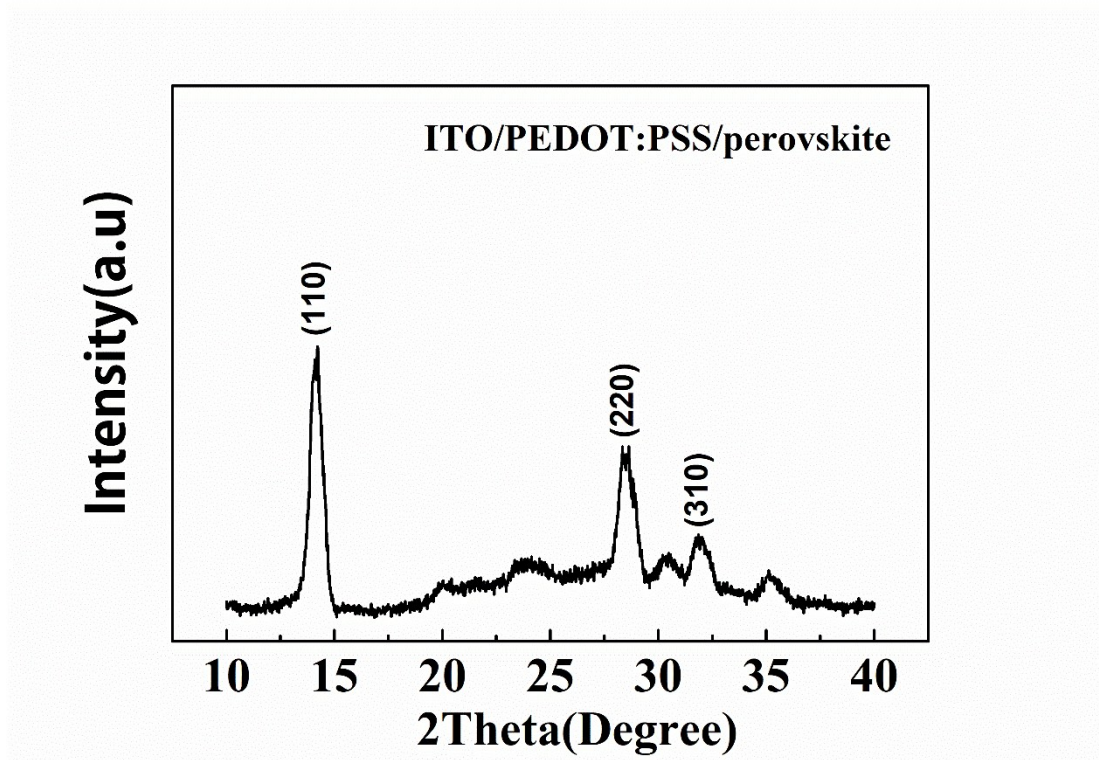

Figure S1. The XRD patterns of perovskite film on PEDOT:PSS.

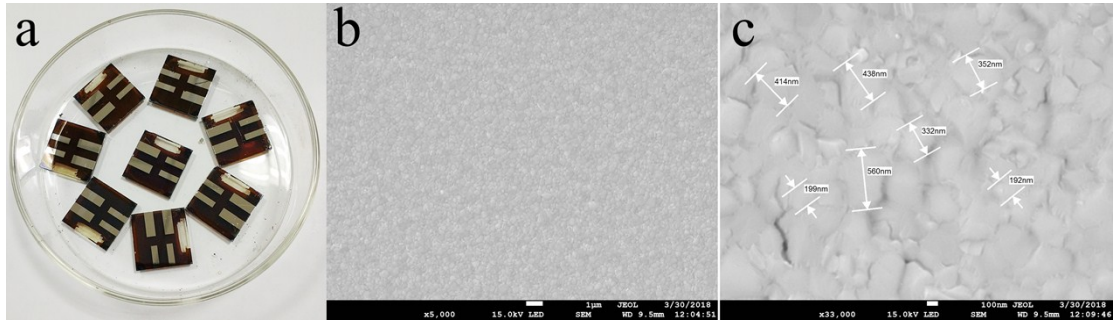

Figure S2. (a) The photograph of devices, (b) and (c) The SEM images of perovskite films.

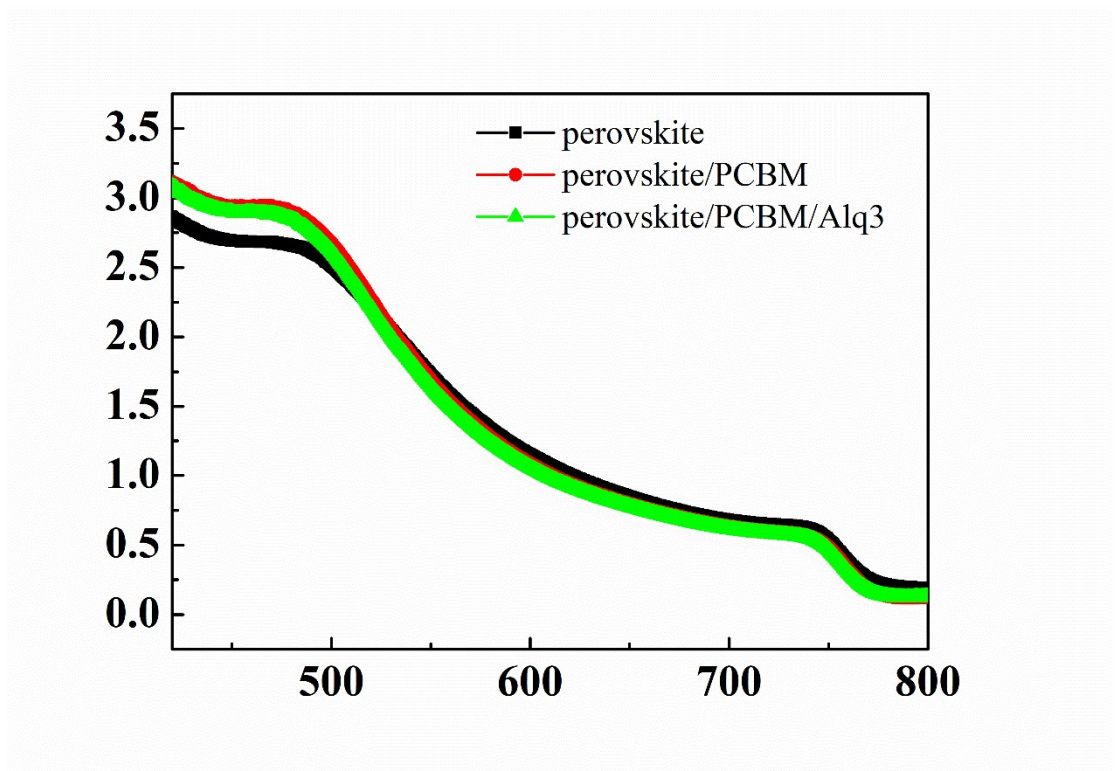

Figure S3. The absorbance of perovskite films with and without buffer layer covered

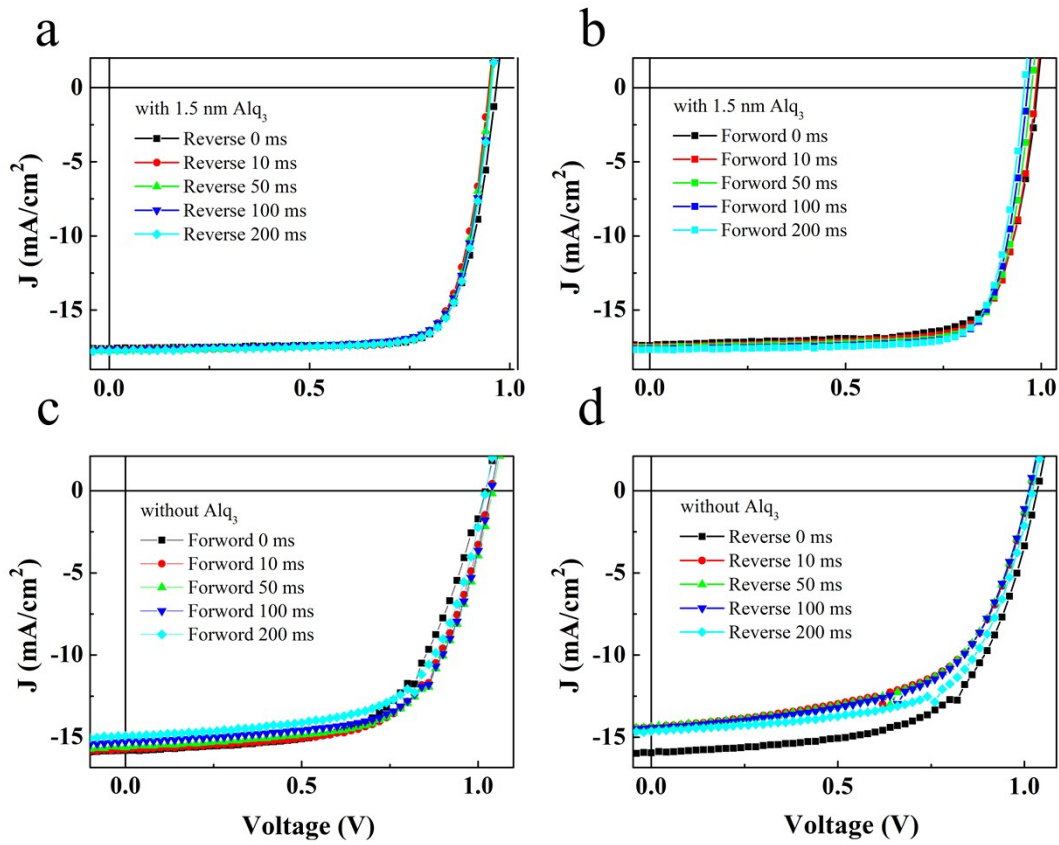

Figure S4. Hysteresis J-V measurements scanned in reverse and forward directions with different delay times for devices with 1.5 nm Alq<sub>3</sub> (a, b) and without Alq<sub>3</sub> (c, d).

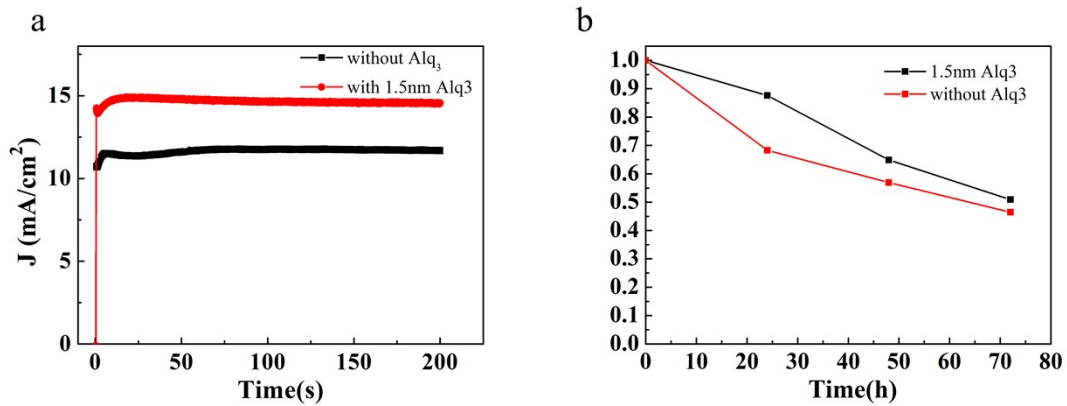

Figure S5. Stability test of solar cells. (a) Stabilized outputs of the PSCs at the maximum power points. (b) Stability and long cycling performance of the solar cells in standard atmospheric (30%-40% RH)
